# Supplementary material for: Alternative σI/anti-σI factors represent a unique form of bacterial σ/anti-σ complex
Source: PubMed Central journal article supplement — Nucleic Acids Res. 2019 May 20;47(11):5988–97. doi: 10.1093/nar/gkz355 (PMC6582324; doi:10.1093/nar/gkz355), 2019-05-20
Supplement: gkz355_supplemental_files.pdf [file gkz355_supplemental_files.pdf]

## Supplementary data for

### Alternative $\sigma^I$ /anti- $\sigma^I$ factors represent a unique form of bacterial $\sigma$ /anti- $\sigma$ complex

Zhen Wei<sup>1,2,3,4</sup>, Chao Chen<sup>1,2,3</sup>, Ya-Jun Liu<sup>1,2,3</sup>, Sheng Dong<sup>1,2,3</sup>, Jie Li<sup>1,2,3,4</sup>, Kuan Qi<sup>1,2,3,4</sup>, Shiyue Liu<sup>1,2,3,4</sup>, Xiaoke Ding<sup>1,2,3</sup>, Lizett Ortiz de Ora<sup>5</sup>, Iván Muñoz-Gutiérrez<sup>6</sup>, Yifei Li<sup>1,2,3</sup>, Hongwei Yao<sup>7</sup>, Raphael Lamed<sup>5</sup>, Edward A. Bayer<sup>6</sup>, Qiu Cui<sup>1,2,3</sup>, Yingang Feng<sup>1,2,3,\*</sup>

<sup>1</sup> CAS Key Laboratory of Biofuels, Qingdao Institute of BioEnergy and Bioprocess Technology, Chinese Academy of Sciences, Qingdao 266101, China

<sup>2</sup> Shandong Provincial Key Laboratory of Energy Genetics, Qingdao Institute of BioEnergy and Bioprocess Technology, Chinese Academy of Sciences, Qingdao 266101, China

<sup>3</sup> Qingdao Engineering Laboratory of Single Cell Oil, Qingdao Institute of BioEnergy and Bioprocess Technology, Chinese Academy of Sciences, Qingdao 266101, China

<sup>4</sup> University of Chinese Academy of Sciences, Beijing 100049, China

<sup>5</sup> Department of Molecular Microbiology and Biotechnology, Tel Aviv University, Tel Aviv, Israel

<sup>6</sup> Department of Biomolecular Sciences, The Weizmann Institute of Science, Rehovot, Israel

<sup>7</sup> High-Field Nuclear Magnetic Resonance Center, Xiamen University, 422 South Siming Road, Xiamen 361005, China

\* To whom correspondence should be addressed. Mail address: 189 Songling Road, Laoshan District, Qingdao 266101, China. Tel.: +86-532-80662706. E-mail: [fengyg@qibebt.ac.cn](mailto:fengyg@qibebt.ac.cn)

Present address: Lizett Ortiz de Ora, Department of Chemistry, University of California, Irvine, California, USA; Iván Muñoz-Gutiérrez, Outreach Research Training and Minority Science Programs, School of Biological Sciences, University of California, Irvine, California, USA; Yifei Li, Vonsun Pharmatech (Suzhou) Co., Ltd., Room 213, Building A4, No 218 Xinghu Street, Suzhou industrial park, Suzhou, Jiangsu, 215000, China.

#### Table of Contents

Figure S1. Sequence alignments of the eight pairs of RsgI<sub>N</sub> (A) and SigI<sub>C</sub> (B) from *C. thermocellum*.

Figure S2. The <sup>1</sup>H-<sup>15</sup>N HSQC spectrum of RsgI<sub>N</sub> with peak assignments.

Figure S3. The NMR titrations of RsgI<sub>N</sub> and SigI<sub>I</sub> domains.

Figure S4. Mass spectrometry results for RNAP component identification of the purified *C. thermocellum* RNAP.

Figure S5. The <sup>1</sup>H-<sup>15</sup>N HSQC spectrum of the RsgI<sub>N</sub>-SigI<sub>C</sub> complex with peak assignments.

Figure S6. Structure comparison of RsgI<sub>N</sub> in free form and in the RsgI<sub>N</sub>-SigI<sub>C</sub> complex.

Figure S7. The <sup>1</sup>H NMR spectra of RsgI<sub>N</sub> mutants.

Figure S8. NMR titrations for mutated sites that contributed to specific recognition of RsgI<sub>N</sub> for SigI<sub>C</sub>.

Table S1. Primer sequences and restriction enzymes used for protein expression constructs in this study.

Table S2. Specific primer sequences for plasmid mutagenesis used in this study.

Table S3. Sequence identities among different pairs of RsgI<sub>N</sub> or SigI<sub>C</sub>.

Table S4. Structural statistics of RsgI<sub>N</sub> and the SigI<sub>C</sub>-RsgI<sub>N</sub> complex.

Table S5. Numbers of identical residues in the interfaces of the RsgI<sub>N</sub>-SigI<sub>C</sub> complexes.

Table S6. Intermolecular interactions in the structure of the SigI<sub>C</sub>-RsgI<sub>N</sub> complex and the structural model of the SigI<sub>2C</sub>-RsgI<sub>2N</sub> complex.

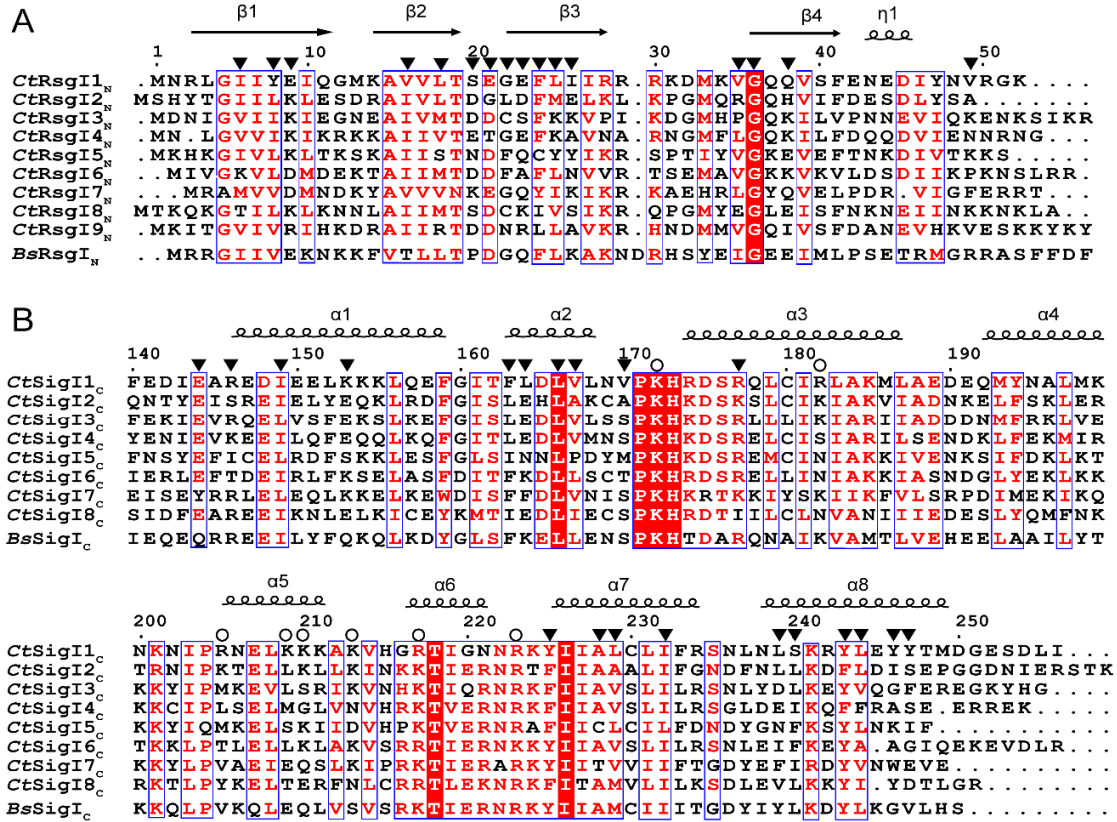

**Figure S1. Sequence alignments of the eight pairs of RsgI<sub>N</sub> (A) and SigI<sub>C</sub> (B) from *C. thermocellum*.** The sequences of RsgI<sub>N</sub> and SigI<sub>C</sub> from *Bacillus subtilis* (*BsRsgI<sub>N</sub>* and *BsSigI<sub>C</sub>*, respectively) are also shown at the bottom of the alignments. Secondary structures of the SigI<sub>1C</sub>-RsgI<sub>1N</sub> complex are indicated at the top of the sequences. Red-highlighted frames indicate residues that are identical, while blue frames represent conserved residues. Residues involved in the interactions between SigI<sub>1C</sub> and RsgI<sub>1N</sub> are indicated by filled triangles. Positively charged residues for potential promoter binding are indicated by open circles.



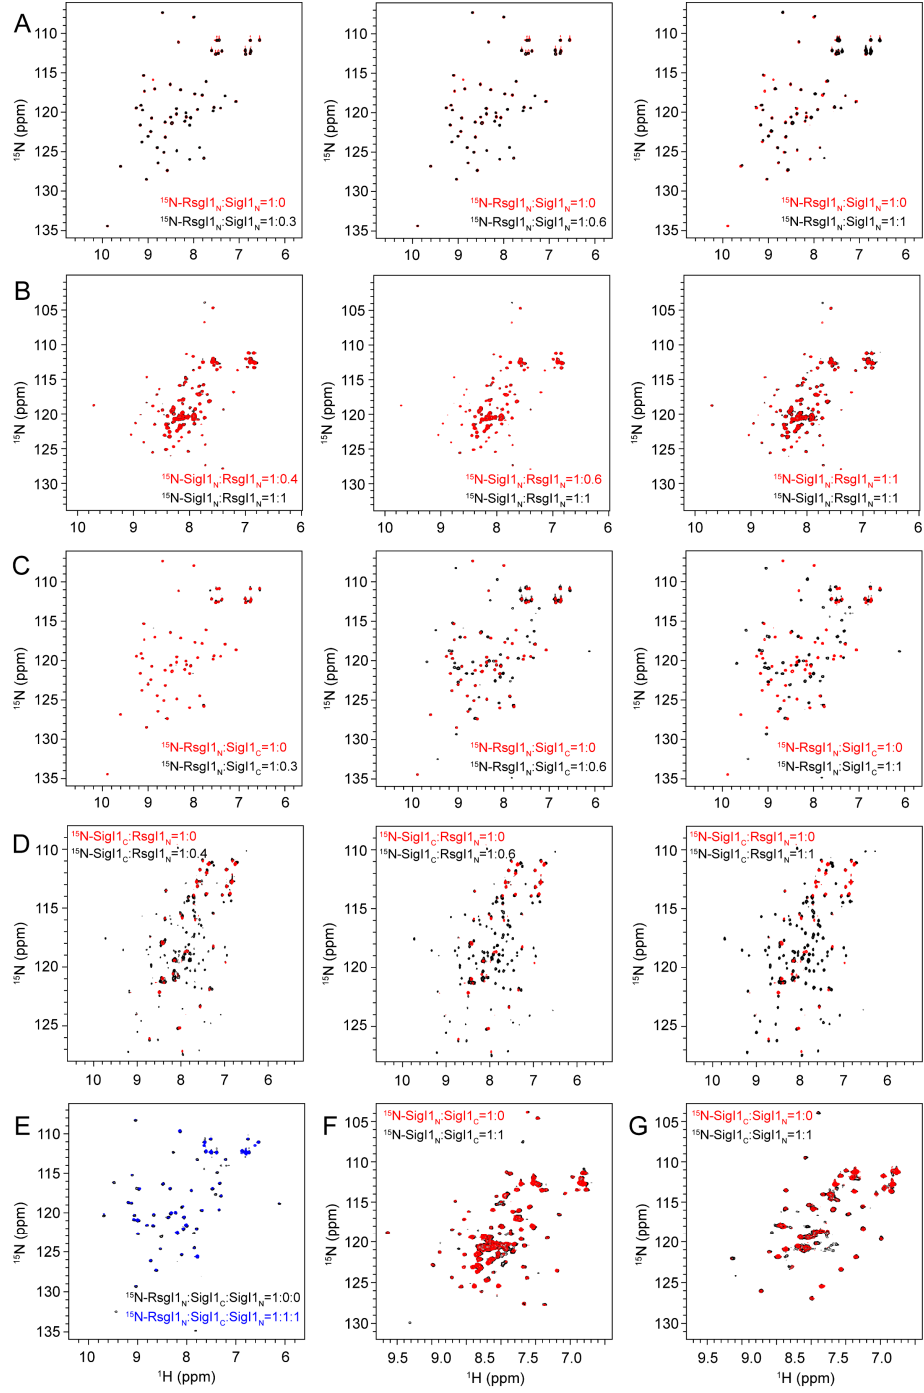

**Figure S3. NMR titrations of RsgI1<sub>N</sub> and SigI1 domains.** (A)  $^1\text{H}$ - $^{15}\text{N}$  HSQC spectra of RsgI1<sub>N</sub> titrated with different ratios of SigI1<sub>N</sub>. (B)  $^1\text{H}$ - $^{15}\text{N}$  HSQC spectra of SigI1<sub>N</sub> titrated with different ratios of RsgI1<sub>N</sub>. (C)  $^1\text{H}$ - $^{15}\text{N}$  HSQC spectra of RsgI1<sub>N</sub> titrated with different ratios of SigI1<sub>C</sub>. (D)  $^1\text{H}$ - $^{15}\text{N}$  HSQC spectra of SigI1<sub>C</sub> titrated with different ratios of RsgI1<sub>N</sub>. (E)  $^1\text{H}$ - $^{15}\text{N}$  HSQC spectra of RsgI1<sub>N</sub> in complex with SigI1<sub>C</sub> titrated with SigI1<sub>N</sub>. (F)  $^1\text{H}$ - $^{15}\text{N}$  HSQC spectra of SigI1<sub>N</sub> titrated with SigI1<sub>C</sub>. (G)  $^1\text{H}$ - $^{15}\text{N}$  HSQC spectra of SigI1<sub>C</sub> titrated with SigI1<sub>N</sub>.

#### RNA polymerase, $\alpha$ subunit

MTETKPKIE CVVCSEDNR EKEVVEPLER GYGITIGNSI RTLLSSLP VAVTS KIDG VLHEFSTIPG VIEDVTEIIL NIK ELSTNPH GEGPKVITD  
 AEGEGGVKAK NTKADADVEI INPEHKTATI SGDHRLYMEV RDKGRGYVS ARKNKHFGQH LGVTPVDSTF PPVHKVNYIV ENTRVCQVTD YDKITLEWVI  
 NGSIKPDEAL SLGAKLISEH LNEELHSDN ANNAEIMVEK EETKK KAVLE MLIIEHDSV SYNCLKRAG INNVBDHSR RBBDMMKVRN LGR KSLSEVV  
 MKLKALEGLR ARSED

#### RNA polymerase, $\beta$ subunit

MVHPVKLGRN VRMSYSK LLE VTEMPTTFE QNSYEQFLK EGFKEVFKDV NPITDYTGNI ILEFVDYSLD EPPKYSVDEC KERDATYAAP LKVKVRLINK  
 ETGEVKEQEI FMGDFPLMTE TGTFTINGAE RVIVSQVLRS PGIYYAMKID KAGQLFSNT VIPNR GAWLE YETDSNDVLS VRIDRTRKLP LTVLVRALGV  
 ETDLPTLLEI QEDERTIATI QKDSKTDEE GLEIYKHIL PGEPTVESAI KALLHGLFFD PKRYDLAKPG RFKFNKKLSI AAR HGFAC ENIKOPDTGE  
 LTVASGETLS ESKAEILQNA GVNVALAVD GNVKVIIGND MVDIKR FVDE DPKKIGINEK VKRDVLMELL EYKKGKDDA IKKALQERD DLEPH HITKE  
 DIISSISYII GLSYGIGSTD DIDHLGNRRL RLVGELLQNG EHLGLSRMER VVRERMTIQD LDVVTPQALI NIRPVAAAIK EFFGSSQLSQ FMDQTNPLAE  
 LTHKRR LSAL GPGGLSERA GFEVRDVHHS HYGRMCPJET PEGPNIGLIG SLSTYARVNE YGFIETPYRK VSKEEPGKVT NEIVYLTADE EDEYIIAQAN  
 EPLDEEGRFI SNKVVCVRYSK EFTVDPSPK HMDVSPKQI VSVATSMITP LENDDANRAL MGANMQRQAV PLIK ESPIV GTGLSYAAR DSGVVTIAKK  
 PGVVRKYTAN LILITKDGK RDTYKLLKYM RSNQGTCTINQ RPIVK KGEAV EAGDVIADGR ETDNGEIALG QNVLVGFMTW EGYNYEDAIL ISER LVKDDV  
 ELSHEDVY EPARDKLGR EDIETREINV SEDALKDINS DGLHIGAEV RGLDLMGVV PPKCEPELPA EMLLLRAIFG EKAREVR DTS LRVPHQESQ  
 MVDMVIFTRE NGDELAPGVN KLVRVYVAQK RKISVGDKMA GRHGNKGVIS RLTPVEDMPE LPDCTPLDIV LNPGLVPSRM NIGQVLEVHL GYAAKALGWK  
 VATEVFDGAI ESDIVQTERK AGLAEDGKSI LYDGRTEPEF ENRVTVGMY MLK LAHLVDH KTHARSTGIV SLVTCQPLEG KAFQGGQRFQ EMEVWALEAY  
 GAAYTLQELI TVKSDDVVGR VKTYEAIKVG ENVPEPGIPE SFKLIKELD SLCHDVKVS EGESEIATKE SVDDDEEIN VNTGREDV NFNEFDNIGE  
 EITDEDLEVE DFDLQDLND DNPDDTIDA ELDDNLFDDDD FDDTFDDDDL

#### RNA polymerase, $\beta'$ subunit

MEFINNDSI RIGLASPEKI REWSRGEVK PETINYRTLK EERDGL CER IFGPQKDWEK HCGKYKRIRY KGIVCDRCGV EVTRSKVRRE RMGHIELAAP  
 VSHIWFYKGI PSR MGLLDM SPRALKKILV PARYAVIDG QPLEKKQIL SEKEYRDSLE KFGPKFRAGM GAEAVR LLLQ LMLDELAD EREPKQSTG  
 QKRVRAIKRI QVVEAFRQSQ NKPEWMILDV IPVIPPELRP MVQLDGGRFV ESDNDLYR VINRNNRLK LMLGAPDI VRNEKRM LQD QVDATIDNGR  
 RGRPVTGPGN RPLKSLSDML KKGQGR PRQN HCKRVDSYG RSVTVVGPBT KTYQCGLPKE MALELFKPFV MK KLVNDGTA HNTKSAKRMV ERVRNEVWDV  
 EEEVKEHPV LNRNAPT LHR LGTQAFEPV VEGRALK LHP LVCTAYNADH DGDQMAIHVE LSARAAQEAR FLMLSANNLL KPQDGKPVAV PTQDMVLGSY  
 YLTILKEGAK GEGRVFTSMD EAVMAYDNGE IELHSKIKVR MKRVVDGVEK SKLETTLGR LFNBAIPQD LGEVDRSDEN KTFDLEVDL VGRNEM KII  
 DKSIVKHGTT KTAILLDKIK ELGFKYSTK ALISISDMV LPEVRAK LIL EPEKTEKIT KQYKRGLSD EERNSVIAE MTEASENITR ALINNLDRFN  
 PVYMMQSQA GININQIKQL AGMRGLMADT SGK EEPPIK ANFREGLTVM EFFISTHGAR KGLADTAIRY ADSGYLTRR VDSQDVIVR ETDGCTR KGI  
 EVIDIKDCNE VTELSERTI GRYPVGNIVH EGTGELIWEK SMITDQDAE KIVKAGIKKV RIRSVLTCHS EYGVCACYG ANLATGEECN VGEAVGIIAA  
 QSIGEPGTQL TMR EPHNGM AGEDDTQGLR AVESLEFARK PKGLALISEI KGVKRISETK KKR LIAVTSB DGBR SYLIP YGSRILKSDG DQVEAGDELH  
 EGSNPHDIA KIKGVEAVQT YLVHEVQKVY RMQGV DINDK EREVAVQML RKVKVEDPGH ESLPSCGIVD VPOFEENAK AIAEGKKPAV AKR ELGLTK  
 AALATDSPLS AASFOETRV LTEAAIK EKV PLVGLR ENV IIGKLIPAGT GMSRYKDITI STVTE

#### RNA polymerase, $\omega$ subunit

MKEKK ERVSS MTRPSINSTL EKVDSTRYTLV VATAKRARQI TDGANKLTNG ESDKPVIVAI NEINENKITV LRTKSGIK

**Figure S4. Mass spectrometry results for RNAP component identification of the purified *C. thermocellum* RNAP.** The identified peptides in mass spectrometry are highlighted in green.



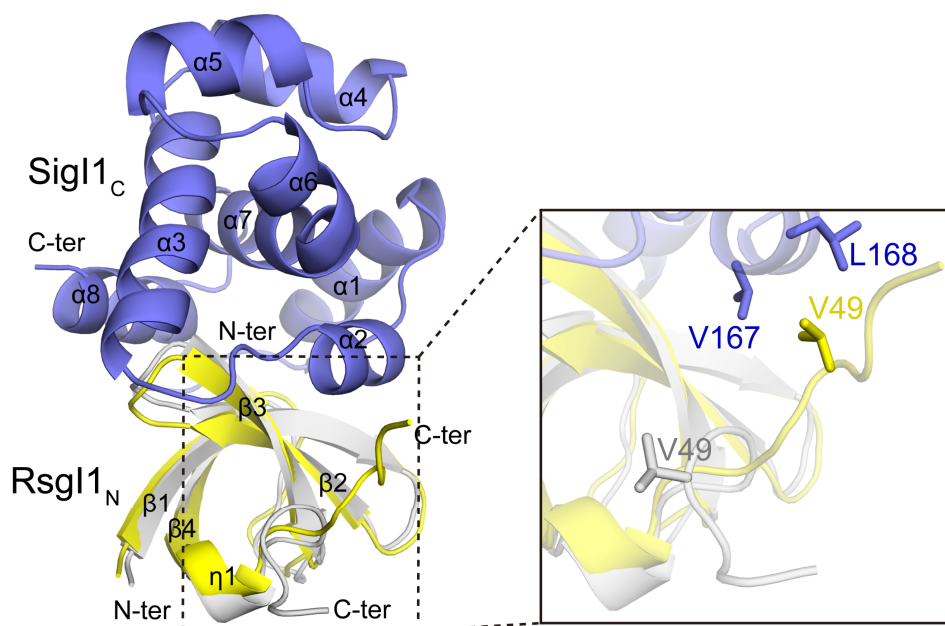

**Figure S6. Structure comparison of RsgI1<sub>N</sub> in free form (light grey) and in the RsgI1<sub>N</sub>-SigI1<sub>C</sub> complex (blue and yellow).** The C-terminal difference caused by the interaction between V49 of RsgI1<sub>N</sub> and V167/L168 of SigI1<sub>C</sub> is shown in detail.

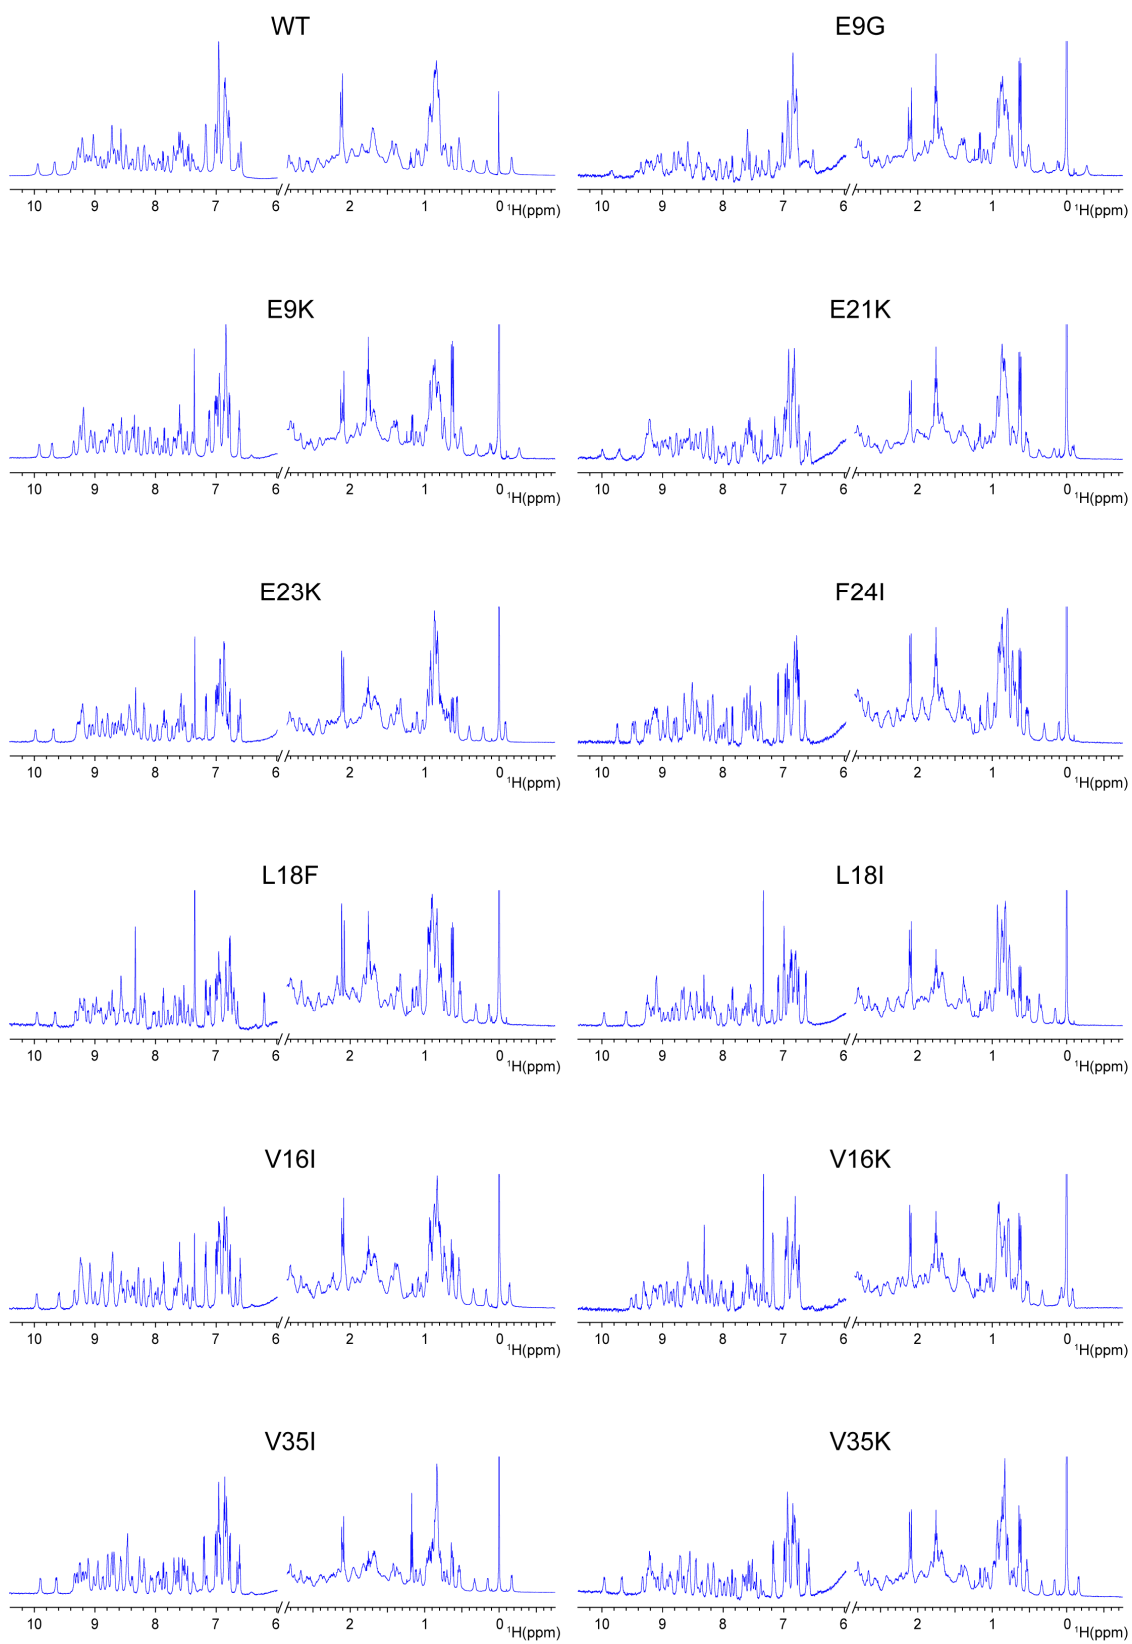

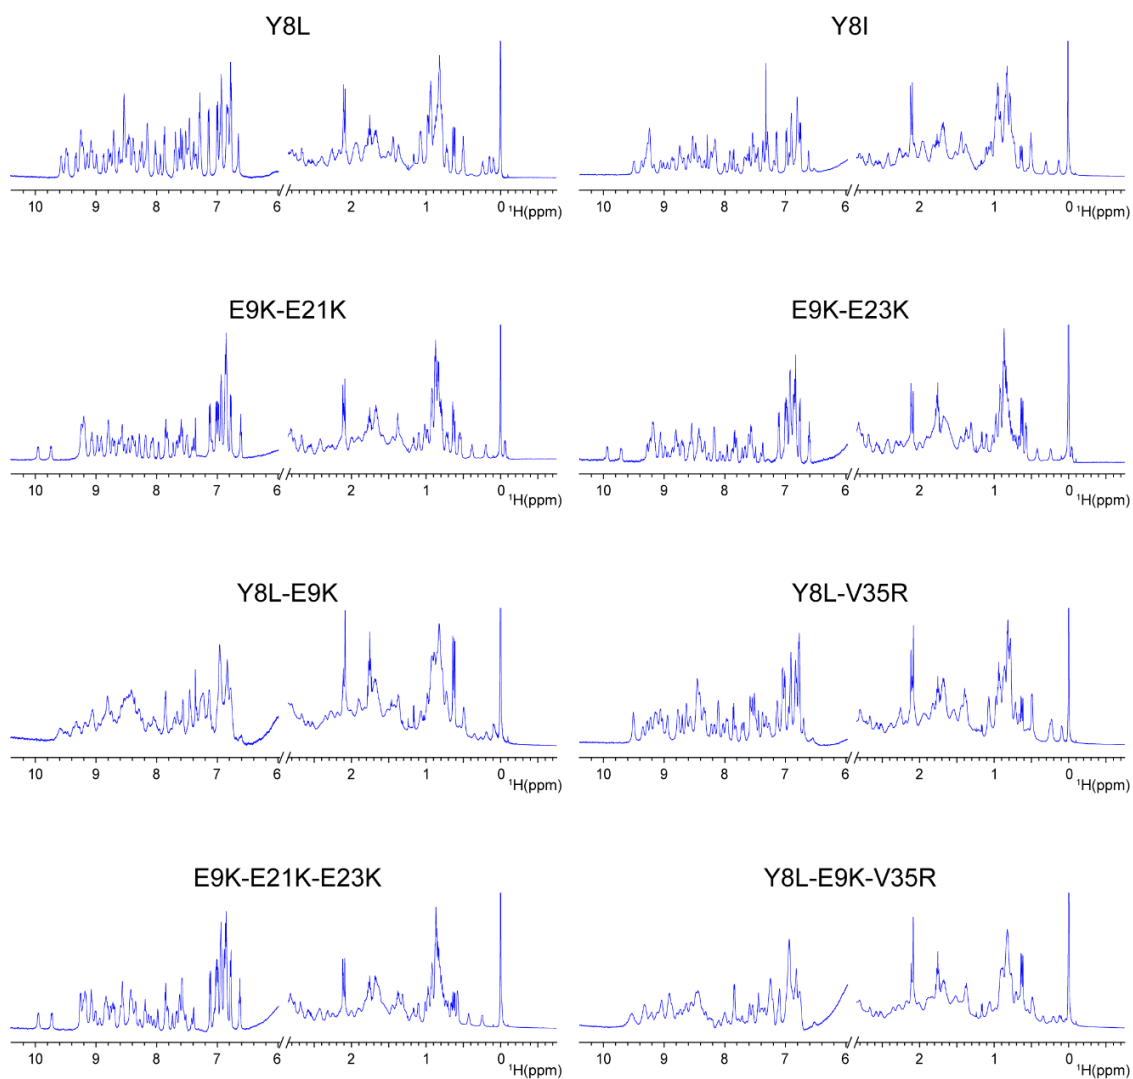

**Figure S7. The  $^1\text{H}$  NMR spectra of *RsgI*<sub>N</sub> mutants.** The proper folding of each mutant is verified by the well-dispersed peaks in both the low field (7.0-10.2 ppm) and the high field (-0.5-1.0 ppm) regions.

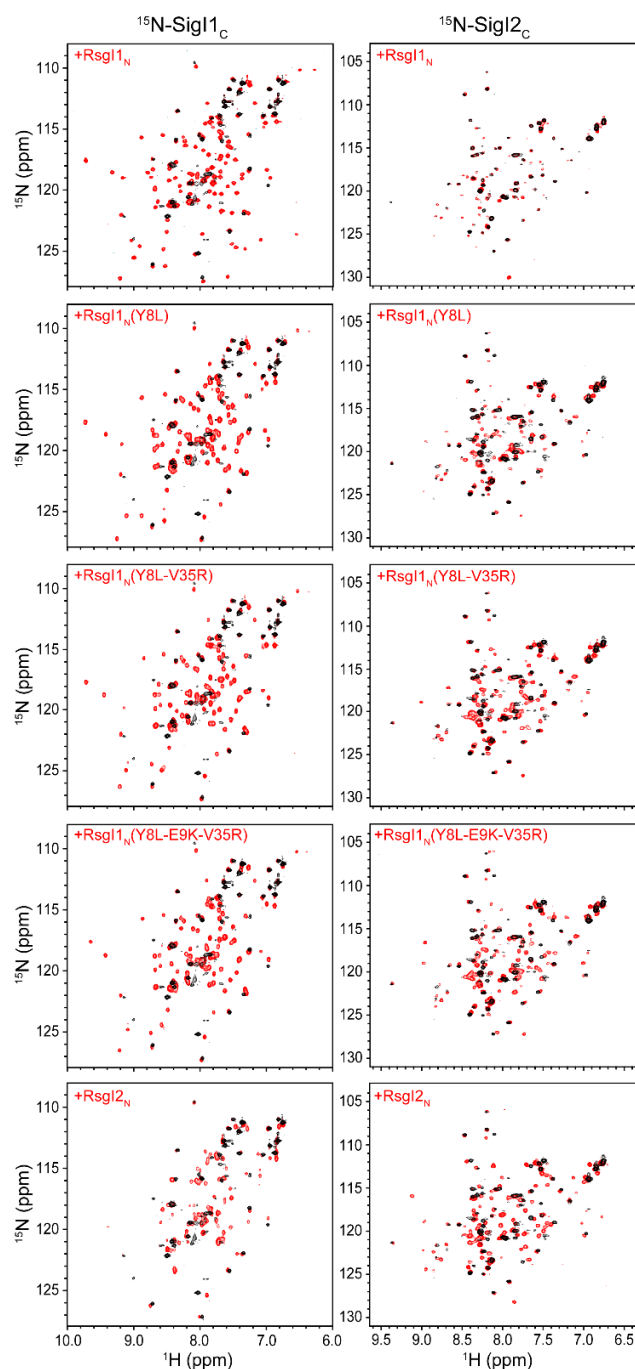

**Figure S8. NMR titrations for mutated sites that contribute to specific recognition of RsgI1<sub>N</sub> for SigI1<sub>C</sub>.** The <sup>1</sup>H-<sup>15</sup>N HSQC spectra of SigI1<sub>C</sub> (left) and SigI2<sub>C</sub> (right) without and with wild-type RsgI1<sub>N</sub>, its mutants, or RsgI2<sub>N</sub> (molar ratio 1:1) are shown in black and red, respectively. The free SigI2<sub>C</sub> and SigI1<sub>C</sub> have similar spectra, and only a few crowded peaks can be observed in the central region of the spectra. The addition of wild-type RsgI2<sub>N</sub> into SigI1<sub>C</sub> resulted in a well-dispersed spectrum, but the addition of wild-type RsgI1<sub>N</sub> into SigI2<sub>C</sub> resulted in only a slight change in the spectrum, thus indicating the specificity of the two RsgI factors. By adding the single, double, and triple mutants of RsgI1<sub>N</sub>, the number of dispersed peaks successively increased in the spectrum

of SigI2<sub>C</sub>, which indicates that the SigI2<sub>C</sub>-RsgI1<sub>N</sub> interaction is enhanced by these mutations. In contrast, upon the addition of these mutants, the spectrum of SigI1<sub>C</sub> displayed successively less dispersed peaks but more crowded peaks, compared with the spectra of SigI1<sub>C</sub> and the wild-type RsgI1<sub>N</sub>. Therefore, the evidence supports the contention that these residues play important roles for specific  $\sigma^I$ /anti- $\sigma^I$  factor recognition between the two complementary pairs of  $\sigma^I$ -anti- $\sigma^I$  factors. The triple mutants of RsgI1<sub>N</sub>, however, still failed to abolish the interaction with SigI1<sub>C</sub> completely, and their interactions with SigI2<sub>C</sub> were not as strong as that of the wild-type RsgI2<sub>N</sub>,

**Table S1. Primer sequences and restriction enzymes used for protein expression constructs in this study.** The restriction enzyme sites in the primer sequences are underlined.

| Recombinant plasmid            | Primer sequences                                                                                 | Restriction enzymes         |
|--------------------------------|--------------------------------------------------------------------------------------------------|-----------------------------|
| pET28a-SMT3-SigI1              | F, 5'-ATT <u>GGATCC</u> GTGGAAGTCCGGAAAAT<br>R, 5'-ATT <u>CTCGAG</u> TTATATAAGGTCAC TTCCCC       | <i>Bam</i> HI, <i>Xho</i> I |
| pET30a-SigI1 <sub>N</sub>      | F, 5'-TTA <u>CATATG</u> GGAAGTCCGGAAAATTAATACC<br>R, 5'-TTT <u>CTCGAGG</u> TTATAAAAATATTCGTCATCA | <i>Nde</i> I, <i>Xho</i> I  |
| pET30a-SigI1 <sub>C</sub>      | F, 5'-TTA <u>CATATG</u> GGAAGATATTGAGGCAAGG<br>R, 5'-TTT <u>CTCGAGC</u> ATAGTATAATACTCCAAATA     | <i>Nde</i> I, <i>Xho</i> I  |
| pET28a-SMT3-RsgI1 <sub>N</sub> | F, 5'-ATT <u>GGATCC</u> ATGAACAGATTGGGAATAAT<br>R, 5'-ATT <u>CTCGAG</u> TTACTTTCCCCTGACA         | <i>Bam</i> HI, <i>Xho</i> I |
| pET28a-SigI2                   | F, 5'-<br>ATACCATGGGCATTGATTTGTTTTCCCCTAAGG<br>R, 5'-TTA <u>CTCGAG</u> TTTTGTGCTCCGTTCAATGTTG    | <i>Nco</i> I, <i>Xho</i> I  |
| pET28a-SigI2 <sub>C</sub>      | F, 5'-TTA <u>CCATGGG</u> CAGTGAAATTGATTTACAAA<br>R, 5'-TTA <u>CTCGAG</u> TTTTGTGCTCCGTTCAAT      | <i>Nco</i> I, <i>Xho</i> I  |
| pET28a-SMT3-RsgI2 <sub>N</sub> | F, 5'-ATT <u>GGATCC</u> ATGTCACATTACACGGGAAT<br>R, 5'-ATT <u>CTCGAG</u> TTAGGCTGAATACAAGTCGGA    | <i>Bam</i> HI, <i>Xho</i> I |

**Table S2. Specific primer sequences for plasmid mutagenesis used in this study.** The mutation sites in primer sequences are shown in red.

| Mutant                             | Primer sequences                                                                                            | Plasmid template                          |
|------------------------------------|-------------------------------------------------------------------------------------------------------------|-------------------------------------------|
| RsgI1 <sub>N</sub> (Y8L)           | F,5'-GAACAGATTGGGAATAATATTTAGAAATTCAGGGCATGAAAG<br>R,5'-CTTTCATGCCCTGAATTTCTAATATTATTCCCAATCTGTTC           | pET28a-SMT3-RsgI1 <sub>N</sub>            |
| RsgI1 <sub>N</sub> (Y8I)           | F,5'-GAACAGATTGGGAATAATAATTGAAATTCAGGGCATGAAAGC<br>R,5'-GCTTTCATGCCCTGAATTTCAATTATTATTCCCAATCTGTTC          | pET28a-SMT3-RsgI1 <sub>N</sub>            |
| RsgI1 <sub>N</sub> (E9K)           | F,5'-ACAGATTGGGAATAATATATATAAATTCAGGGCATGAAAGCT<br>R,5'-AGCTTTCATGCCCTGAATTTATATATTATTCCCAATCTGT            | pET28a-SMT3-RsgI1 <sub>N</sub>            |
| RsgI1 <sub>N</sub> (E9G)           | F,5'-ACAGATTGGGAATAATATATATGGAATTCAGGGCATGAAAGCT<br>R,5'-AGCTTTCATGCCCTGAATTTCCATATATTATTCCCAATCTGT         | pET28a-SMT3-RsgI1 <sub>N</sub>            |
| RsgI1 <sub>N</sub> (V16K)          | F,5'-GAAATTCAGGGCATGAAAGCTAAAGTTCTGACAAGCGAAGGCG<br>R,5'-CGCCTTCGCTTGTGAGAATTTAGCTTTCATGCCCTGAATTTTC        | pET28a-SMT3-RsgI1 <sub>N</sub>            |
| RsgI1 <sub>N</sub> (V16I)          | F,5'-ATTCAGGGCATGAAAGCTATTGTTCTGACAAGCGAAGGCGAAT R,5'-<br>ATTCGCCCTTCGCTTGTGAGAATCAATAGCTTTCATGCCCTGAAT     | pET28a-SMT3-RsgI1 <sub>N</sub>            |
| RsgI1 <sub>N</sub> (L18I)          | F,5'-GGGCATGAAAGCTGTAGTTATTACAAGCGAAGGCGAATTT<br>R,5'-AAATTCGCCCTTCGCTTGTAACTACAGCTTTCATGCCCT               | pET28a-SMT3-RsgI1 <sub>N</sub>            |
| RsgI1 <sub>N</sub> (L18F)          | F,5'-CAGGGCATGAAAGCTGTAGTTTACAAGCGAAGGCGAAT<br>R,5'-ATTCGCCCTTCGCTTGTAAACTACAGCTTTCATGCCCTG                 | pET28a-SMT3-RsgI1 <sub>N</sub>            |
| RsgI1 <sub>N</sub> (E21K)          | F,5'-GAAAGCTGTAGTTCTGACAAGCAAGGCGAATTTTGATTATTCGC<br>R,5'-GCGAATAATCAAAAATTCGCCCTTGCTTGTGAGAATACAGCTTTC     | pET28a-SMT3-RsgI1 <sub>N</sub>            |
| RsgI1 <sub>N</sub> (E23K)          | F,5'-TAGTTCTGACAAGCGAAGGCAAAATTTTGATTATTCGCAG<br>R,5'-CTGCGAATAATCAAAAATTTGCCCTTCGCTTGTGAGAATA              | pET28a-SMT3-RsgI1 <sub>N</sub>            |
| RsgI1 <sub>N</sub> (F24I)          | F,5'-GTTCTGACAAGCGAAGGCGAAATTTTGATTATTCGACAGGCGCAAAG<br>R,5'-CTTTCGCCCTGCGAATAATCAAAATTTGCCCTTCGCTTGTGAGAAC | pET28a-SMT3-RsgI1 <sub>N</sub>            |
| RsgI1 <sub>N</sub> (I26E)          | F,5'-GACAAGCGAAGGCGAATTTTGGAAATTCGACAGGCGCAAAGATATG<br>R,5'-CATATCTTTGCCCTGCGAATTTCCAAAAATTCGCCCTTCGCTTGTG  | pET28a-SMT3-RsgI1 <sub>N</sub>            |
| RsgI1 <sub>N</sub> (V35K)          | F,5'-GCAGGCGCAAAGATATGAAGAAAGGACAGCAGGTGAGTTTTG<br>R,5'-CAAAACTCACCTGCTGTCTTTCTTCATATCTTTGCCGCTGCG          | pET28a-SMT3-RsgI1 <sub>N</sub>            |
| RsgI1 <sub>N</sub> (V35I)          | F,5'-ATTCGACAGGCGCAAAGATATGAAGATTGGACAGCAGGTGAGT<br>R,5'-ACTCACCTGCTGTCCAACTTCATATCTTTGCCGCTGCGAAT          | pET28a-SMT3-RsgI1 <sub>N</sub>            |
| RsgI1 <sub>N</sub> (E9K-E21K)      | F,5'-GAAAGCTGTAGTTCTGACAAGCAAGGCGAATTTTGATTATTCG<br>R,5'-CGAATAATCAAAAATTCGCCCTTGCTTGTGAGAATACAGCTTTC       | pET28a-SMT3-RsgI1 <sub>N</sub> (E9K)      |
| RsgI1 <sub>N</sub> (E9K-E23K)      | F,5'-TAGTTCTGACAAGCGAAGGCAAAATTTTGATTATTCGCAG<br>R,5'-CTGCGAATAATCAAAAATTTGCCCTTCGCTTGTGAGAATA              | pET28a-SMT3-RsgI1 <sub>N</sub> (E9K)      |
| RsgI1 <sub>N</sub> (Y8L-E9K)       | F,5'-GAACAGATTGGGAATAATATTTAAAAATTCAGGGCATGAAAGC<br>R,5'-GCTTTCATGCCCTGAATTTTAATATTATTCCCAATCTGTTC          | pET28a-SMT3-RsgI1 <sub>N</sub>            |
| RsgI1 <sub>N</sub> (Y8L-V35R)      | F,5'-GCAGGCGCAAAGATATGAAGCGTGGACAGCAGGTGAGTTTTG<br>R,5'-CAAAACTCACCTGCTGTCCACGCTTCATATCTTTGCCGCTGCG         | pET28a-SMT3-RsgI1 <sub>N</sub> (Y8L)      |
| RsgI1 <sub>N</sub> (E9K-E21K-E23K) | F,5'-CTGTAGTTCTGACAAGCAAGGCAAAATTTTGATTATTCGACAGG<br>R,5'-CCTGCGAATAATCAAAAATTTGCCCTTGCTTGTGAGAATACAG       | pET28a-SMT3-RsgI1 <sub>N</sub> (E9K)      |
| RsgI1 <sub>N</sub> (Y8L-E9K-V35R)  | F,5'-GATTGGGAATAATATTAATAATTCAGGGCATGAAAGCTG<br>R,5'-CAGCTTTCATGCCCTGAATTTTAATATTATTCCCAATC                 | pET28a-SMT3-RsgI1 <sub>N</sub> (Y8L-V35R) |
| SigI1 <sub>c</sub> (K209E)         | F,5'-CATACCCAGAAATGAATTAAGAAAGCAAGGTTACACGG<br>R,5'-CCGTGAACCTTGGCTTTCTTTCTAATTCATTCTGGGTATG                | pET30a-SigI1 <sub>c</sub>                 |
| SigI1 <sub>c</sub> (R217E)         | F,5'-GAAAGCCAAGGTTACGGGGAGACCATAGGCAATAATAG<br>R,5'-CTATTATTGCCTATGGTCTCCCCGTGAACCTTGGCTTTC                 | pET30a-SigI1 <sub>c</sub>                 |
| SigI1 <sub>c</sub> (K209E-R217E)   | F,5'-GAAAGCCAAGGTTACGGGGAGACCATAGGCAATAATAG<br>R,5'-CTATTATTGCCTATGGTCTCCCCGTGAACCTTGGCTTTC                 | pET30a-SigI1 <sub>c</sub> (K209E)         |

**Table S3. Sequence identities among different pairs of RsgI<sub>N</sub> or SigI<sub>C</sub>.**

| RsgI <sub>N</sub> (%) | <i>Ct</i><br>RsgI1 | <i>Ct</i><br>RsgI2 | <i>Ct</i><br>RsgI3 | <i>Ct</i><br>RsgI4 | <i>Ct</i><br>RsgI5 | <i>Ct</i><br>RsgI6 | <i>Ct</i><br>RsgI7 | <i>Ct</i><br>RsgI8 | <i>Ct</i><br>RsgI9 | <i>Bs</i><br>RsgI |
|-----------------------|--------------------|--------------------|--------------------|--------------------|--------------------|--------------------|--------------------|--------------------|--------------------|-------------------|
| <i>Ct</i> RsgI1       | 100                | 28.9               | 26.9               | 32.7               | 28.9               | 23.1               | 19.2               | 26.9               | 34.6               | 26.9              |
| <i>Ct</i> RsgI2       |                    | 100                | 30.0               | 26.0               | 28.0               | 24.0               | 12.0               | 30.0               | 32.0               | 15.4              |
| <i>Ct</i> RsgI3       |                    |                    | 100                | 39.6               | 19.2               | 27.3               | 17.0               | 35.7               | 35.1               | 16.1              |
| <i>Ct</i> RsgI4       |                    |                    |                    | 100                | 23.5               | 26.9               | 19.2               | 25.0               | 32.1               | 15.4              |
| <i>Ct</i> RsgI5       |                    |                    |                    |                    | 100                | 33.3               | 17.7               | 43.1               | 31.4               | 17.6              |
| <i>Ct</i> RsgI6       |                    |                    |                    |                    |                    | 100                | 21.2               | 30.8               | 29.1               | 16.7              |
| <i>Ct</i> RsgI7       |                    |                    |                    |                    |                    |                    | 100                | 11.5               | 15.4               | 21.2              |
| <i>Ct</i> RsgI8       |                    |                    |                    |                    |                    |                    |                    | 100                | 30.9               | 14.5              |
| <i>Ct</i> RsgI9       |                    |                    |                    |                    |                    |                    |                    |                    | 100                | 15.5              |
| <i>Bs</i> RsgI        |                    |                    |                    |                    |                    |                    |                    |                    |                    | 100               |
| SigI <sub>C</sub> (%) | <i>Ct</i><br>SigI1 | <i>Ct</i><br>SigI2 | <i>Ct</i><br>SigI3 | <i>Ct</i><br>SigI4 | <i>Ct</i><br>SigI5 | <i>Ct</i><br>SigI6 | <i>Ct</i><br>SigI7 | <i>Ct</i><br>SigI8 |                    | <i>Bs</i><br>SigI |
| <i>Ct</i> SigI1       | 100                | 36.0               | 42.7               | 39.3               | 33.6               | 45.3               | 27.3               | 40.9               |                    | 36.0              |
| <i>Ct</i> SigI2       |                    | 100                | 43.1               | 40.2               | 39.1               | 38.5               | 28.2               | 30.0               |                    | 32.4              |
| <i>Ct</i> SigI3       |                    |                    | 100                | 52.1               | 40.4               | 44.4               | 33.6               | 34.6               |                    | 35.1              |
| <i>Ct</i> SigI4       |                    |                    |                    | 100                | 39.1               | 45.3               | 28.2               | 36.4               |                    | 38.7              |
| <i>Ct</i> SigI5       |                    |                    |                    |                    | 100                | 37.3               | 30.0               | 25.5               |                    | 35.5              |
| <i>Ct</i> SigI6       |                    |                    |                    |                    |                    | 100                | 32.7               | 38.2               |                    | 36.0              |
| <i>Ct</i> SigI7       |                    |                    |                    |                    |                    |                    | 100                | 24.6               |                    | 36.9              |
| <i>Ct</i> SigI8       |                    |                    |                    |                    |                    |                    |                    | 100                |                    | 31.5              |
| <i>Bs</i> SigI        |                    |                    |                    |                    |                    |                    |                    |                    |                    | 100               |

**Table S4. Structural statistics of RsgI1<sub>N</sub> and the SigI1<sub>C</sub>-RsgI1<sub>N</sub> complex.**

| Parameters                                           | RsgI1 <sub>N</sub> | SigI1 <sub>C</sub> -RsgI1 <sub>N</sub> complex |
|------------------------------------------------------|--------------------|------------------------------------------------|
| NOE restraints                                       |                    |                                                |
| Intra-residue                                        | 591                | 1470                                           |
| Sequential                                           | 346                | 864                                            |
| Medium-range                                         | 184                | 570                                            |
| Long-range                                           | 514                | 1012                                           |
| Ambiguous                                            | 688                | 2356                                           |
| Total                                                | 2323               | 6272                                           |
| Number per residue                                   | 43.6               | 36.7                                           |
| Hydrogen bond restraints                             | 21                 | 160                                            |
| Torsion angle restraints                             |                    |                                                |
| Phi (Φ) angle restraints                             | 45                 | 148                                            |
| Psi (Ψ) angle restraints                             | 45                 | 148                                            |
| Chi (χ) angle restraints                             | 23                 | 73                                             |
| Violations                                           |                    |                                                |
| Max. NOE violation (Å)                               | 0.140              | 0.179                                          |
| Max. torsion angle violation (°)                     | 2.01               | 4.57                                           |
| R.M.S.D from mean structure (Å)                      |                    |                                                |
| Residues in regular secondary structure <sup>a</sup> |                    |                                                |
| Backbone heavy atoms                                 | 0.18±0.03          | 0.30±0.06                                      |
| All heavy atoms                                      | 0.63±0.08          | 0.75±0.05                                      |
| All residues <sup>b</sup>                            |                    |                                                |
| Backbone heavy atoms                                 | 1.40±0.26          | 0.70±0.16                                      |
| All heavy atoms                                      | 1.83±0.25          | 1.10±0.11                                      |
| Ramachandran statistics                              |                    |                                                |
| Most favored region (%)                              | 89.9               | 91.9                                           |
| Additionally allowed (%)                             | 10.0               | 7.4                                            |
| Generously allowed (%)                               | 0.1                | 0.3                                            |
| Disallowed (%)                                       | 0.0                | 0.5 <sup>c</sup>                               |
| WHAT_CHECK Z-scores <sup>d</sup>                     |                    |                                                |
| 1st generation packing quality                       | -0.477             | -0.275                                         |
| 2nd generation packing quality                       | 2.279              | -0.292                                         |
| Ramachandran plot appearance                         | -2.622             | -2.461                                         |
| chi-1/chi-2 rotamer normality                        | -2.839             | -2.448                                         |
| Backbone conformation                                | -0.039             | -0.240                                         |
| Inside/Outside distribution                          | 1.013              | 0.978                                          |

<sup>a</sup> The residues in regular secondary structure include 2-11, 14-19, 24-28, 38-42, and 43-45 of RsgI1<sub>N</sub> and 146-159, 163-167, 174-188, 191-200, 205-211, 216-221, 223-234, and 238-248 of SigI1<sub>C</sub>.

<sup>b</sup> The artificial residues at the N- and C-termini introduced by cloning are excluded.

<sup>c</sup> All residues in the disallowed region are in the terminal disordered loops.

<sup>d</sup> For Z-scores, a more positive value is better.

**Table S5. Number of identical residues in the interface of the RsgI<sub>N</sub>-SigI<sub>C</sub> complexes.**

| RsgI <sub>N</sub> | <i>Ct</i><br>RsgI1 | <i>Ct</i><br>RsgI2 | <i>Ct</i><br>RsgI3 | <i>Ct</i><br>RsgI4 | <i>Ct</i><br>RsgI5 | <i>Ct</i><br>RsgI6 | <i>Ct</i><br>RsgI7 | <i>Ct</i><br>RsgI8 | <i>Ct</i><br>RsgI9 | <i>Bs</i><br>RsgI |
|-------------------|--------------------|--------------------|--------------------|--------------------|--------------------|--------------------|--------------------|--------------------|--------------------|-------------------|
| <i>Ct</i> RsgI1   | 16                 | 4                  | 2                  | 4                  | 3                  | 4                  | 5                  | 2                  | 4                  | 7                 |
| <i>Ct</i> RsgI2   |                    | 16                 | 5                  | 4                  | 5                  | 5                  | 1                  | 4                  | 3                  | 4                 |
| <i>Ct</i> RsgI3   |                    |                    | 16                 | 8                  | 5                  | 7                  | 2                  | 7                  | 5                  | 4                 |
| <i>Ct</i> RsgI4   |                    |                    |                    | 16                 | 3                  | 4                  | 4                  | 3                  | 4                  | 3                 |
| <i>Ct</i> RsgI5   |                    |                    |                    |                    | 16                 | 6                  | 2                  | 7                  | 4                  | 5                 |
| <i>Ct</i> RsgI6   |                    |                    |                    |                    |                    | 16                 | 2                  | 5                  | 6                  | 4                 |
| <i>Ct</i> RsgI7   |                    |                    |                    |                    |                    |                    | 16                 | 1                  | 2                  | 5                 |
| <i>Ct</i> RsgI8   |                    |                    |                    |                    |                    |                    |                    | 16                 | 3                  | 3                 |
| <i>Ct</i> RsgI9   |                    |                    |                    |                    |                    |                    |                    |                    | 16                 | 4                 |
| <i>Bs</i> RsgI    |                    |                    |                    |                    |                    |                    |                    |                    |                    | 16                |
| SigI <sub>C</sub> | <i>Ct</i><br>SigI1 | <i>Ct</i><br>SigI2 | <i>Ct</i><br>SigI3 | <i>Ct</i><br>SigI4 | <i>Ct</i><br>SigI5 | <i>Ct</i><br>SigI6 | <i>Ct</i><br>SigI7 | <i>Ct</i><br>SigI8 |                    | <i>Bs</i><br>SigI |
| <i>Ct</i> SigI1   | 20                 | 7                  | 8                  | 7                  | 6                  | 10                 | 8                  | 8                  |                    | 10                |
| <i>Ct</i> SigI2   |                    | 20                 | 9                  | 11                 | 4                  | 5                  | 3                  | 9                  |                    | 6                 |
| <i>Ct</i> SigI3   |                    |                    | 20                 | 12                 | 6                  | 7                  | 9                  | 11                 |                    | 9                 |
| <i>Ct</i> SigI4   |                    |                    |                    | 20                 | 4                  | 8                  | 6                  | 9                  |                    | 6                 |
| <i>Ct</i> SigI5   |                    |                    |                    |                    | 20                 | 5                  | 3                  | 5                  |                    | 4                 |
| <i>Ct</i> SigI6   |                    |                    |                    |                    |                    | 20                 | 7                  | 6                  |                    | 10                |
| <i>Ct</i> SigI7   |                    |                    |                    |                    |                    |                    | 20                 | 5                  |                    | 7                 |
| <i>Ct</i> SigI8   |                    |                    |                    |                    |                    |                    |                    | 20                 |                    | 9                 |
| <i>Bs</i> SigI    |                    |                    |                    |                    |                    |                    |                    |                    |                    | 20                |

**Table S6. Intermolecular interactions in the structure of the SigI1<sub>C</sub>-RsgI1<sub>N</sub> complex and the structural model of the SigI2<sub>C</sub>-RsgI2<sub>N</sub> complex.**

|                                       | RsgI1 <sub>N</sub> -SigI1 <sub>C</sub>                              | RsgI2 <sub>N</sub> -SigI2 <sub>C</sub>                              |
|---------------------------------------|---------------------------------------------------------------------|---------------------------------------------------------------------|
| Hydrophobic interactions <sup>a</sup> | (I6)...(L239)                                                       | (I7)...(L245, L246, F249)                                           |
|                                       | (V16)...(F163, L164, V167)                                          | (L9)...(I155, L169, F243, L246)                                     |
|                                       | (L18)...(L229, I232, L244)                                          | (I17)...(L169)                                                      |
|                                       |                                                                     | (L19)...(L246, L250)                                                |
|                                       |                                                                     | (L23)...(I187, F249, L250)                                          |
|                                       | (F24)...(F163, L166, V167, V170, Y225, A228, L229, I232)            | (F25)...(L172, F231, A234)                                          |
|                                       | (L25)...(V167, V170)                                                |                                                                     |
|                                       | (I26)...(L164, V167)                                                |                                                                     |
|                                       | (V35)...(R146, I149)                                                |                                                                     |
|                                       | (V49)...(V167, V170)                                                |                                                                     |
| Hydrogen bonds <sup>b</sup>           | (Y8 O <sup>η</sup> H <sup>η</sup> )...(S240 O <sup>γ</sup> )        |                                                                     |
|                                       | (S20 O)...(Y246 O <sup>η</sup> H <sup>η</sup> )                     |                                                                     |
|                                       | (E21 O <sup>ε</sup> )...(Y247 O <sup>η</sup> H <sup>η</sup> )       |                                                                     |
|                                       | (G22 O)...(Y225 O <sup>η</sup> H <sup>η</sup> )                     |                                                                     |
|                                       | (G36 O)...(E144 NH)                                                 | (R36 O)...(S152 O <sup>γ</sup> H <sup>γ</sup> )                     |
|                                       | (Q38 O <sup>ε1</sup> )...(Y243 O <sup>η</sup> H <sup>η</sup> )      | (G37 O)...(E150 NH)                                                 |
| Ionic bonds <sup>c</sup>              | (E9 O <sup>ε</sup> )...(K153 N <sup>ζ</sup> )                       | (K10 N <sup>ζ</sup> )...(E159 O <sup>ε</sup> )                      |
|                                       |                                                                     | (R15 N <sup>η1,2</sup> H <sup>η1,2</sup> )...(E170 O <sup>ε</sup> ) |
|                                       | (E21 O <sup>ε</sup> )...(R177 N <sup>η1,2</sup> H <sup>η1,2</sup> ) |                                                                     |
|                                       | (E23 O <sup>ε</sup> )...(R177 N <sup>η1,2</sup> H <sup>η1,2</sup> ) | (D24 O <sup>δ</sup> )...(K183 N <sup>ζ</sup> )                      |
|                                       |                                                                     | (R36 N <sup>η1,2</sup> H <sup>η1,2</sup> )...(E156 O <sup>ε</sup> ) |
|                                       |                                                                     |                                                                     |

<sup>a</sup> The listed hydrophobic interactions were determined by a 5-Å distance cut-off between the hydrophobic-group carbon atoms of two residues in more than half of the total number of structures.

<sup>b</sup> The listed hydrogen bond interactions were determined by a 2.5-Å distance cut-off between the hydrogen donor and receptor atoms in more than half of the total number of structures.

<sup>c</sup> The listed ionic bond interactions were determined by a 5-Å distance cut-off between the charged group nitrogen/oxygen atoms of two residues in more than half of the total number of structures.
